# Supplementary material for: CRISPR Interference of a Clonally Variant GC-Rich Noncoding RNA Family Leads to General Repression of var Genes in Plasmodium falciparum
Source: PubMed Central journal article supplement (PMC6974570; doi:10.1128/mbio.03054-19), 2020-01-21

# FIGURE S2

## A

dCas9 ChIP enrichment at GC-rich genes at 12hpi

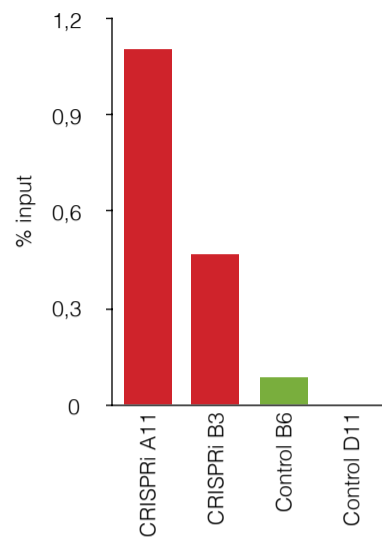

## B

dCas9 ChIP at GC-rich genes at 24hpi

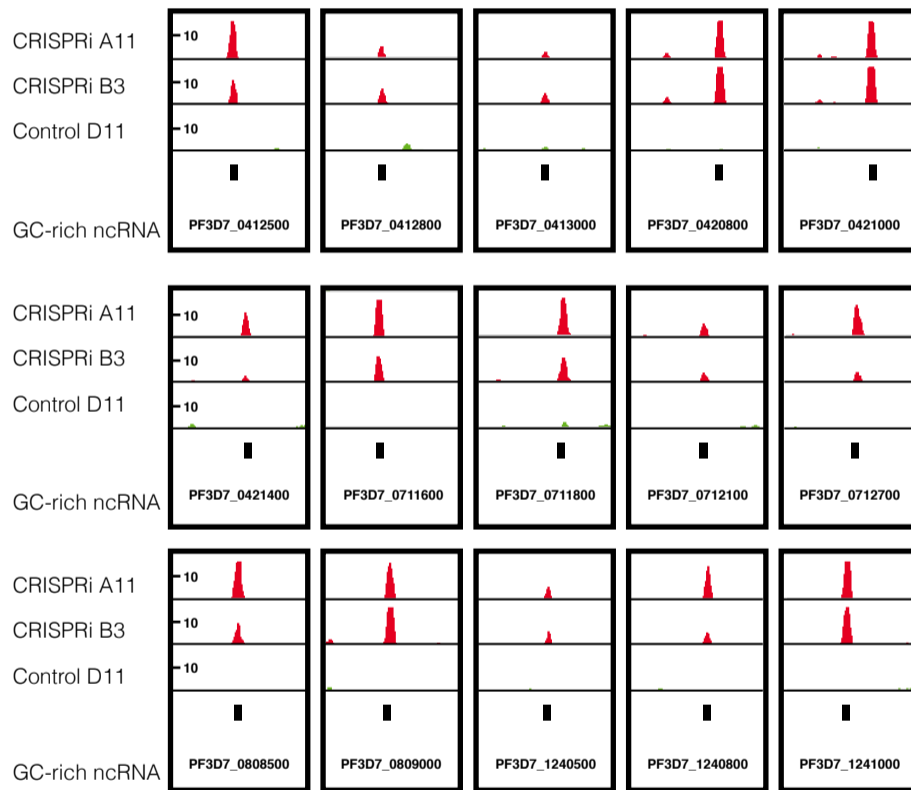

Supplement: mBio.03054-19-sf002.pdf [file mBio.03054-19-sf002.pdf]
