# Supplementary material for: CRISPR Interference of a Clonally Variant GC-Rich Noncoding RNA Family Leads to General Repression of var Genes in Plasmodium falciparum
Source: PubMed Central journal article supplement (PMC6974570; doi:10.1128/mbio.03054-19), 2020-01-21

**FIGURE S5****A**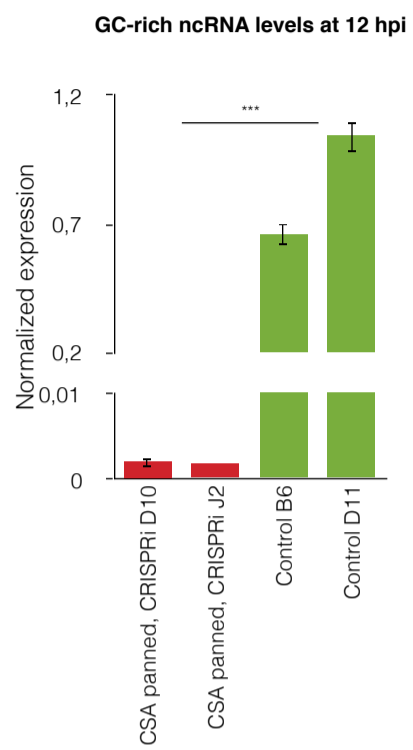**B**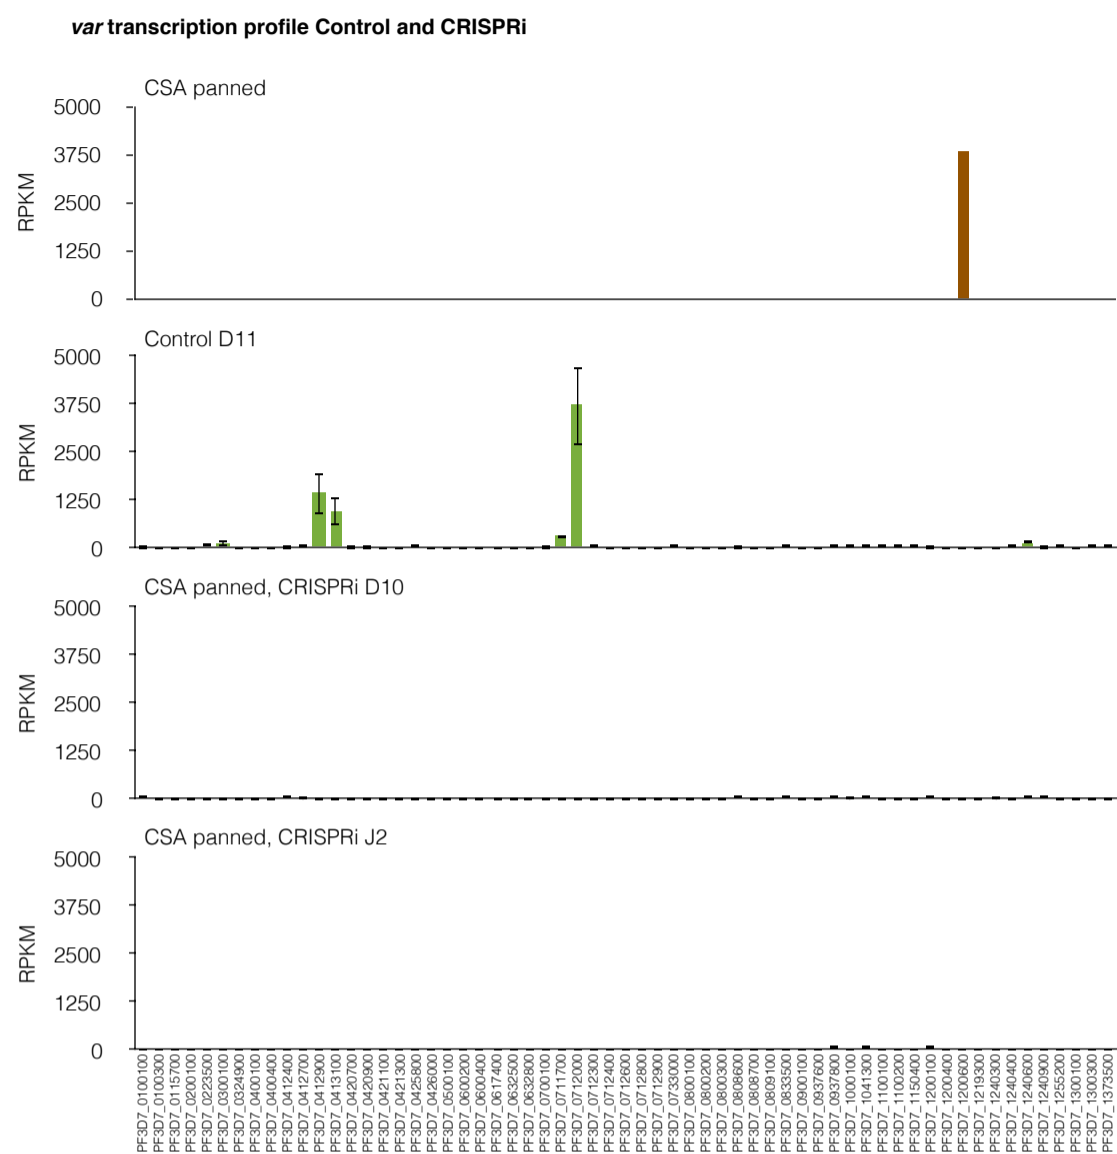

Supplement: mBio.03054-19-sf005.pdf [file mBio.03054-19-sf005.pdf]
