# Supplementary material for: CRISPR Interference of a Clonally Variant GC-Rich Noncoding RNA Family Leads to General Repression of var Genes in Plasmodium falciparum
Source: PubMed Central journal article supplement (PMC6974570; doi:10.1128/mbio.03054-19), 2020-01-21

# FIGURE S7

**A**

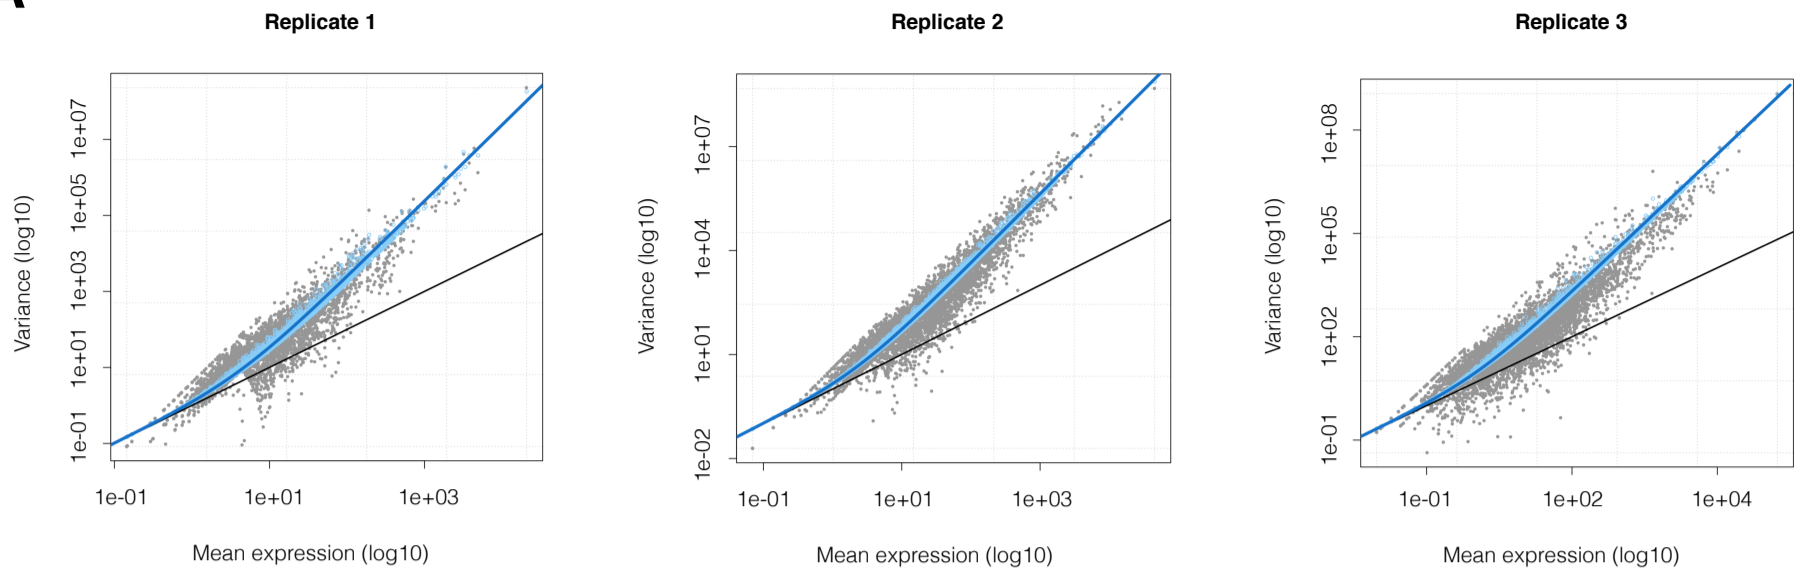

**B**

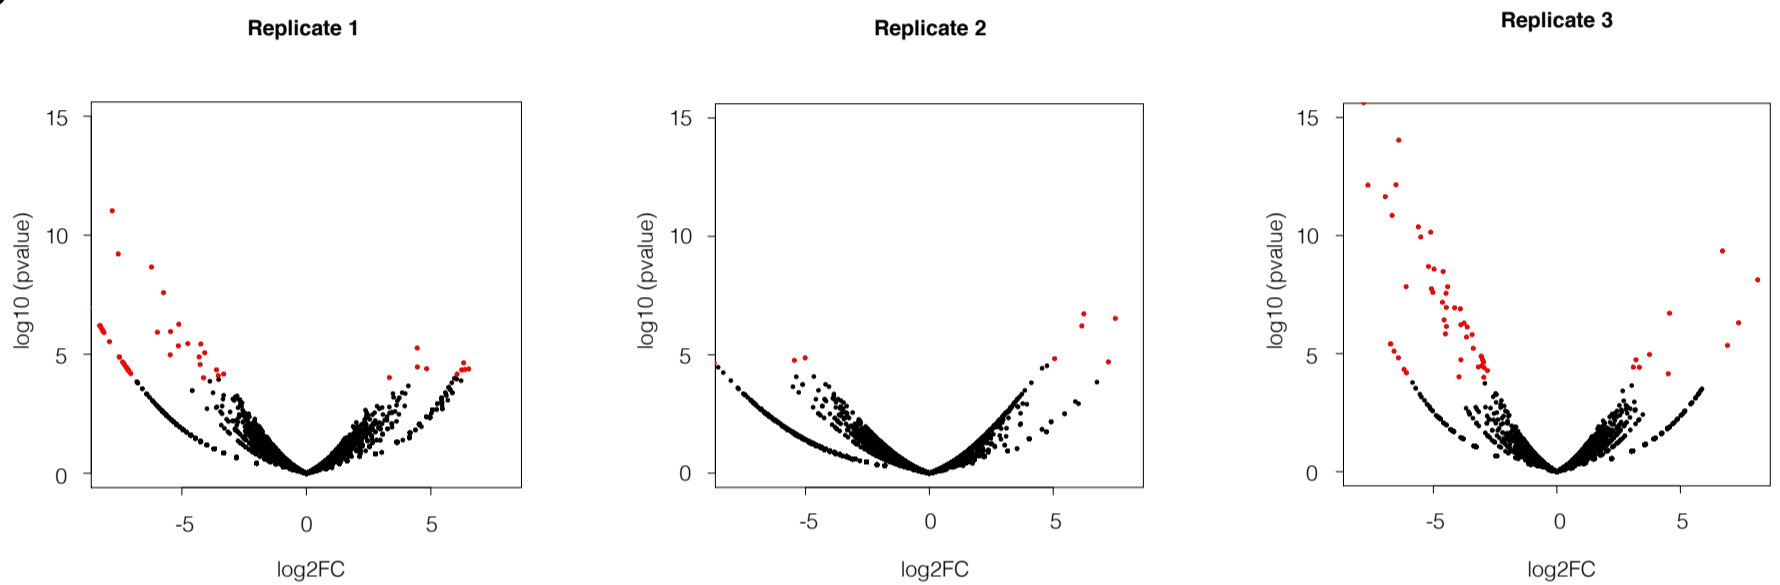

**C**

Top differentially expressed genes, replicate 1

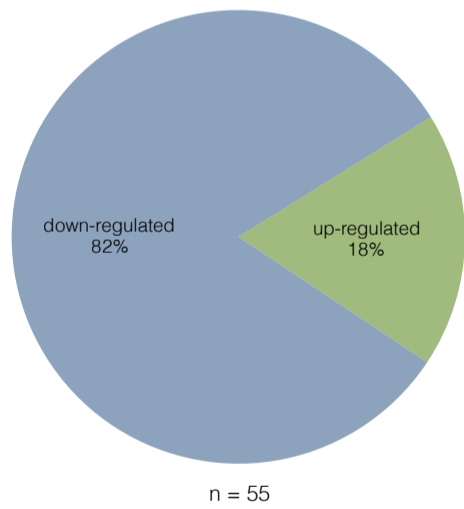

Top differentially expressed genes, replicate 2

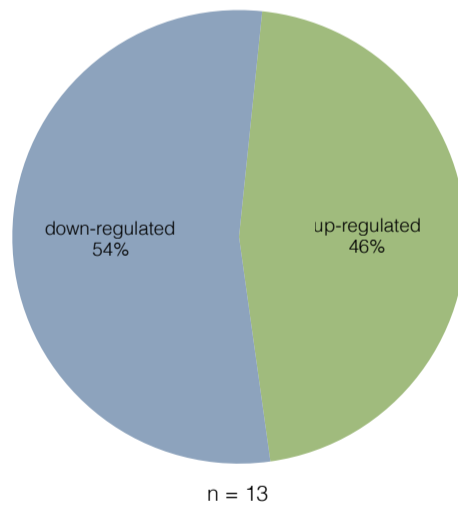

Top differentially expressed genes, replicate 3

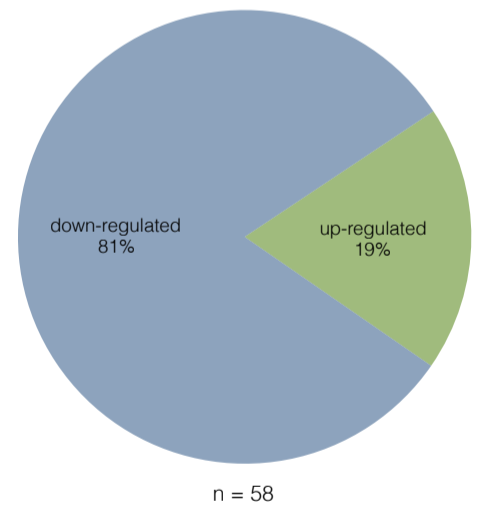

**D**

Top down-regulated genes, replicate 1

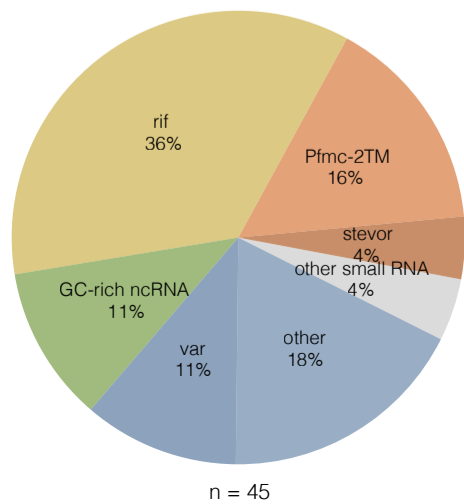

Top down-regulated genes, replicate 2

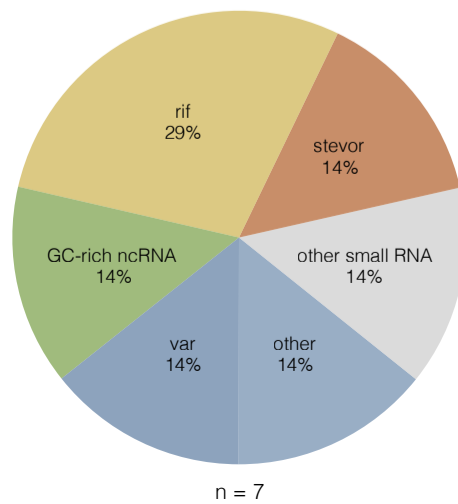

Top down-regulated genes, replicate 3

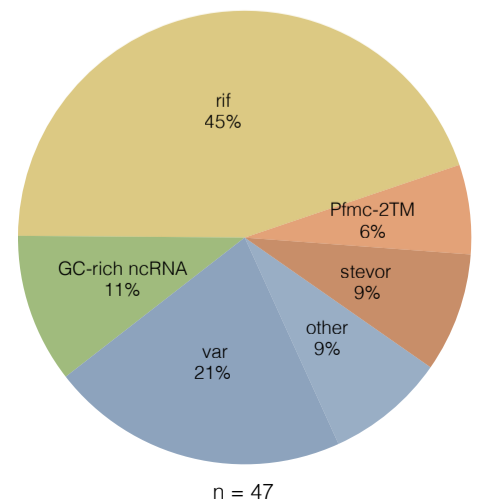

Supplement: mBio.03054-19-sf007.pdf [file mBio.03054-19-sf007.pdf]
